## Erratum

### **Impact of Methylprednisolone on Postoperative Quality of Recovery and Delirium in the Steroids in Cardiac Surgery Trial: A Randomized, Double-blind, Placebo-controlled Substudy: Erratum**

In the article beginning on page 223 in the February 2017 issue, there is an error in the sentence, "The incidence of delirium for the control group was 10%, which was similar to that in patients given methylprednisolone (8%; OR, 0.31; 95% CI, 0.73 to 2.48;  $P = 0.357$ ; table 3)." The correct sentence is, "The incidence of delirium for the control group was 10%, which was similar to that in patients given methylprednisolone (8%; OR, 0.74; 95% CI, 0.40 to 1.37;  $P = 0.357$ ; table 3)."

The authors regret this error. The online version and PDF of the article have been corrected.

#### **Reference**

Royse CF, Saager L, Whitlock R, Ou-Young J, Royse A, Vincent J, Devereaux PJ, Kurz A, Awais A, Panjasawatwong K, Sessler DI: Impact of methylprednisolone on postoperative quality of recovery and delirium in the Steroids in Cardiac Surgery trial: A randomized, double-blind, placebo-controlled substudy. *ANESTHESIOLOGY* 2017; 126:223–33
